# Supplementary material
Source: PubMed Central journal article supplement (PMC5068316)
Supplement: pnas.1604850113.sapp.pdf [file pnas.1604850113.sapp.pdf]

---

**Algorithm 1** Creation of parameters for one Eedn convolutional layer

---

**Input:** Input feature count  $f_i$ , filter height  $r$  rows, filter width  $c$  columns, output feature count  $f_o$  (number of filters), and number of groups  $G$  (where each group is a disjoint subset of the filters, applied to a disjoint subset of the input features),

**Output:** Permuted ordering of input features  $\mathbf{P}$ , continuous weight matrix  $\mathbf{W}^h$ , discretized weight matrix  $\mathbf{W}$ , weight mask matrix  $\mathbf{M}$  to enforce groups, vector of biases  $\mathbf{B}$

- 1: Assert( $f_i rc/G = \lceil f_i rc/G \rceil$ ) // Ensure total filter inputs are evenly divisible across groups
  - 2: Assert( $f_o/G = \lceil f_o/G \rceil$ ) // Ensure output features are evenly divisible across groups
  - 3: Assert( $f_i rc/G \leq 128$ ) // Ensure filter support region fits on one core
  - 4: Assert( $f_o/G \leq 128$ ) // Ensure output features per group fits on one core
  - 5:  $\mathbf{P} \leftarrow \text{Randperm}(f_i)$  // Create list of integers from 1 to  $f_i$ , randomly ordered
  - 6:  $\mathbf{B} = \text{zeros}(f_o)$  // Vector of zeros of length  $f_o$
  - 7:  $\mathbf{W}^h \leftarrow \text{Rand}(r, c, f_i, f_o)$  //  $rcf_i \times f_o$  matrix of random real numbers drawn from  $[-1, 1]$
  - 8:  $\mathbf{M} \leftarrow \text{Createmask}(r, c, f_i, f_o, G)$  // Create  $rcf_i \times f_o$  block diagonal matrix with blocks of size  $rcf_i/G \times f_o/G$  consisting of all 1s, and with 0s everywhere else; block size corresponds to input features per group  $\times$  output features per group
  - 9:  $\mathbf{W}^h \leftarrow \mathbf{W}^h \circ \mathbf{M}$  // enforce groups by zeroing non-block diagonal values
  - 10:  $\mathbf{W} \leftarrow \text{Round}(\mathbf{W}^h)$  // Initialize weights to use in forward and backward pass
-

---

**Algorithm 2** One iteration of Eedn training algorithm for a network with  $K$  layers. Blue text indicates steps not standard in conventional deep learning

---

**Input:** Network parameters  $\{\mathbf{P}, \mathbf{W}, \mathbf{W}^h, \mathbf{M}, \mathbf{B}\}_{k=1}^K$  (set in Algorithm 1); network input  $\mathbf{X}_0$ ;  $\mathbf{F}$ , a list of the class each output feature is assigned to predict (assignments are made randomly such that each class has an equal number of features); class labels  $\hat{\mathbf{Y}}$   
**Output:** Trained network parameters

**Forward propagation:**

- 1: **for**  $k = 1$  to  $K$  **do**
- 2:  $\mathbf{X}_{k-1} \leftarrow \text{Permute}(\mathbf{X}_{k-1}, \mathbf{P}_k)$  // Permute features of  $\mathbf{X}_{k-1}$  according to  $\mathbf{P}_k$
- 3:  $\mathbf{X}_k \leftarrow \text{Forward}(\mathbf{X}_{k-1}, \mathbf{W}_k, \mathbf{B}_k)$  // Layer forward pass (see eqs. 1, 2, and 4)
- 4: **end for**
- 5:  $\mathbf{Y} \leftarrow \text{ComputeVotes}(\mathbf{X}_K, \mathbf{F})$  // Each output feature at each spatial location casts one vote for its assigned class (determined by  $\mathbf{F}$ ) if it is spiking, creating the network's prediction  $\mathbf{Y}$ .

**Loss:**

- 6:  $L, \frac{\partial L}{\partial \mathbf{Y}} \leftarrow \text{ComputeLoss}(\mathbf{Y}, \hat{\mathbf{Y}})$  // Compute loss,  $L$ , and loss gradient,  $\frac{\partial L}{\partial \mathbf{Y}}$ . The softmax cross entropy loss function was used for this work.

**Backward propagation:**

- 7:  $\frac{\partial L}{\partial \mathbf{X}_K} \leftarrow \text{BackwardComputeVotes}(\frac{\partial L}{\partial \mathbf{Y}}, \mathbf{F})$  // Backward pass through voting step.
- 8: **for**  $k = K$  to 1 **do**
- 9:  $\frac{\partial L}{\partial \mathbf{X}_k}, \frac{\partial L}{\partial \mathbf{W}_k}, \frac{\partial L}{\partial \mathbf{B}_k} \leftarrow \text{Backward}(\frac{\partial L}{\partial \mathbf{X}_{k+1}}, \mathbf{W}_k, \mathbf{B}_k)$  // Layer backward pass (see eq. 5)
- 10:  $\frac{\partial L}{\partial \mathbf{X}_k} \leftarrow \text{Permute}(\frac{\partial L}{\partial \mathbf{X}_k}, \text{Inverse}(\mathbf{P}_k))$  // Reverse feature permutation of forward pass
- 11: **end for**

**Parameter update:**

- 12: **for**  $k = 1$  to  $K$  **do**
  - 13:  $\frac{\partial L}{\partial \mathbf{W}_k} \leftarrow \frac{\partial L}{\partial \mathbf{W}_k} \circ \mathbf{M}$  // Enforce groups
  - 14:  $\mathbf{B}_k \leftarrow \text{Update}(\mathbf{B}_k, \frac{\partial L}{\partial \mathbf{B}_k})$  // Update bias.
  - 15:  $\mathbf{W}_k^h \leftarrow \text{Update}(\mathbf{W}_k^h, \frac{\partial L}{\partial \mathbf{W}_k})$  // Update continuous weights using gradient computed with respect to discretized weights.
  - 16:  $\mathbf{W}_k^h \leftarrow \text{Clip}(\mathbf{W}_k^h, -1, 1)$  // Snap values outside of range  $[-1, 1]$  to nearest value in range.
  - 17:  $\mathbf{W}_k \leftarrow \text{Cast}(\mathbf{W}_k^h, \mathbf{W}_k)$  // Cast weights to  $\{-1, 0, 1\}$  values using hysteresis (see eq. 6).
  - 18: **end for**
-
